# Supplementary material for: Detection of COVID-19 and age-dependent dysosmia with paired crushable odorant ampules
Source: bioRxiv or medRxiv preprint supplement (doi:10.1101/2022.03.13.22271253), 2022-04-12
Supplement: Supplementary file [file media-2.pdf]

# How to use yoUR Smell Test

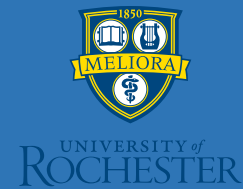

## TEST ADMINISTRATION

- 1) Select a UR smell test kit, hold it between your thumb and forefinger, with your arm at your side.  
Say: **“We’re going to test your ability to smell now”**

- 2) Bring the uncrushed ampule up to the patient’s nose and ask:

**“While inhaling deeply through your nose,  
do you smell anything?”**

While demonstrating strong sniffing for the patient (as if you have a runny nose.) *\*At this point, the patient may indicate they smell the gloves, perfumed soap/sanitizers, ambient smells in the room.*

- 3) Lower the ampule with yellow end (“L” embossed on end) facing down (**Figure 1**) crush the ampule ONCE toward the middle, it will make a popping noise and the white case will **turn yellow** after a few seconds as you keep the yellow end oriented downwards. (**Figure 2**).

- 4) **After 4 to 5 seconds**, bring the crushed ampule to the patient’s nose, and ask:  
**“Do you smell anything?”**

Note the response.

(Yes: likely normal smell; No: hyposmia or anosmia depends on next challenge)

- 5) Lower the ampule and rotate the test with the opposite end down (“H” embossed on end) (**Figure 3**). Crush the ampule ONCE towards the middle, it will make a popping noise and the white case will **turn blue** after a few seconds.

**After 4 to 5 seconds**, bring the crushed ampule to the patient’s nose and ask:  
**“Do you smell anything?”**

Note the response.

(Yes: Normal or Hyposmic [cannot smell low concentration]; No: Anosmic)

Figure 1

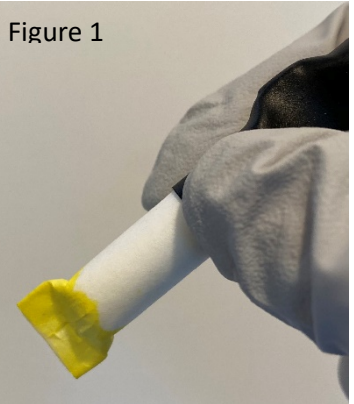

Figure 2

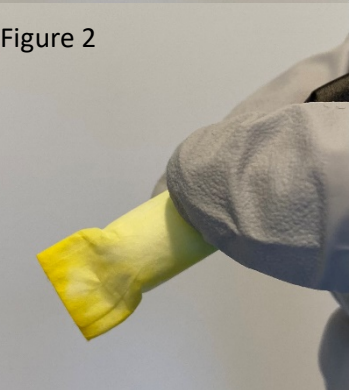

Figure 3

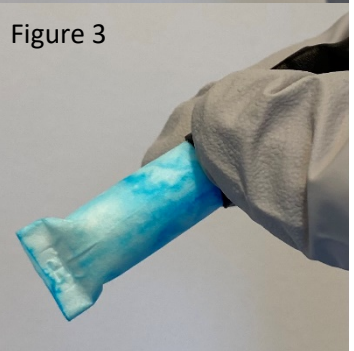

## INTERPRETATION OF RESULTS

A person with a normal sense of smell should respond:

- No to blank (If they note the ambient smells in the room that is OK)
- Yes to low concentration (e.g., “Different, but something is there.”, “Hard to smell, but I do smell something.” ...)
- Yes to high concentration (e.g., “Definitely different”, “More intense” may also have a strong response with facial expression, turning head away.)

An anosmic person can’t smell anything.

An hyposmic person cannot smell the low concentration (yellow) but can smell the high concentration (blue).

This test assesses sensitivity to n-butanol, a non-toxic food additive in water with added food coloring.

Present Uncrushed Ampule

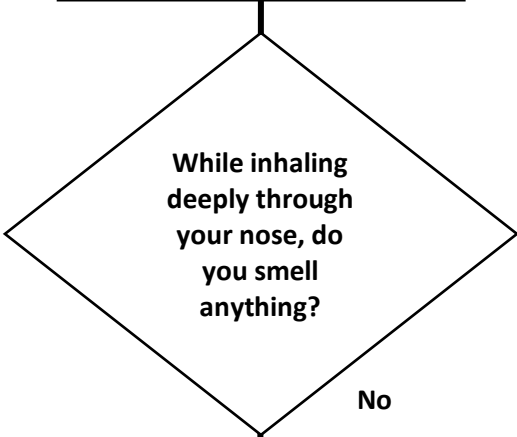

No

Crush, wait 4-5 seconds  
Present crushed Low Concentration

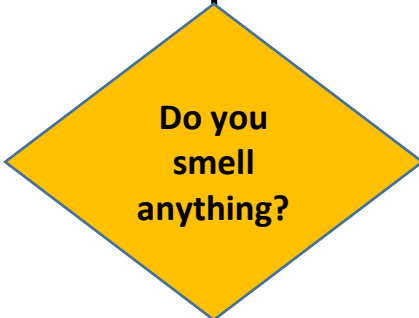

Yes: Normal

Present crushed High Concentration

No: anosmic or hyposmic

Crush, wait 4-5 seconds  
Present crushed High Concentration

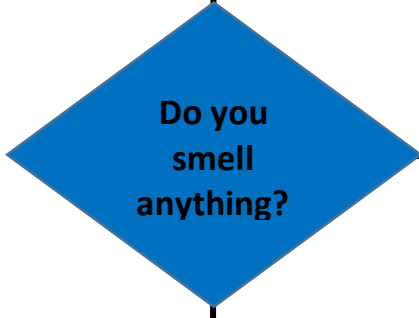

No: Anosmic

Yes: Hyposmic

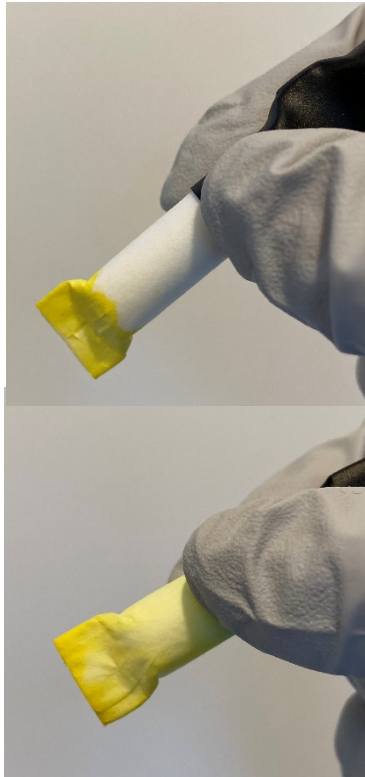

If patient smells the blank,  
Discuss gloves, plastic,  
perfume or other items in  
room; repeat

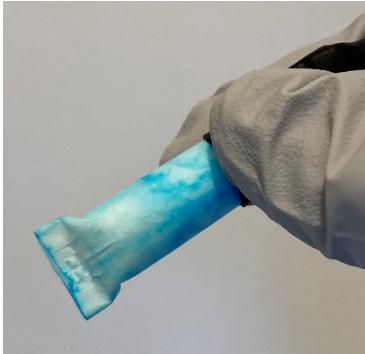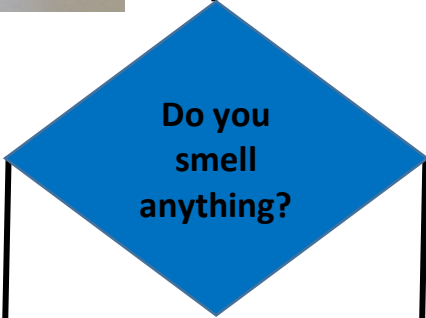

Yes: Normal

No: Error, Repeat test

This test assesses sensitivity to n-butanol, a non-toxic food additive in water with added food coloring.
