# Supplementary material for: Detection of COVID-19 and age-dependent dysosmia with paired crushable odorant ampules
Source: bioRxiv or medRxiv preprint supplement (doi:10.1101/2022.03.13.22271253), 2022-04-12
Supplement: Supplementary file [file media-3.pdf]

**S1 Table. Ethnic and racial demographics of 2450 patients presenting to the preprocedural testing clinics that were approached for olfactory testing with n-butanol in crushable ampules.** No patients were excluded from this tabulation that extended several days after the retrieval of the data used for logistic regression.

| <u>Ethnicity</u>       | Site 1 | Site 2 | Total |
|------------------------|--------|--------|-------|
| Hispanic or Latinx     | 54     | 94     | 148   |
| Not Hispanic or Latinx | 821    | 1247   | 2068  |
| Unknown                | 74     | 160    | 234   |
| Total                  | 949    | 1501   | 2450  |

| <u>Race</u>                               | Site 1 | Site 2 | Total |
|-------------------------------------------|--------|--------|-------|
| American Indian or Alaska Native          | 2      | 3      | 5     |
| Asian                                     | 11     | 23     | 34    |
| Black or African American                 | 113    | 226    | 339   |
| Native Hawaiian or Other Pacific Islander | 1      | 0      | 1     |
| White or Caucasian                        | 770    | 1142   | 1912  |
| Multiracial/Other                         | 39     | 72     | 111   |
| Unknown                                   | 13     | 35     | 48    |
| Total                                     | 949    | 1501   | 2450  |
