# Supplementary material for: Detection of COVID-19 and age-dependent dysosmia with paired crushable odorant ampules
Source: bioRxiv or medRxiv preprint supplement (doi:10.1101/2022.03.13.22271253), 2022-04-12
Supplement: Supplementary file [file media-4.pdf]

**S2 Table. Estimated incidence of dysosmia as a function of subject age and odorant concentration.**

Linear regression was performed on the coefficients and constants of three logistic regressions in table 1 (0.06%, 0.32%, and 3.2% from site 2) as a function of the log of test concentration. These two linear regressions<sup>1</sup> were used to obtain coefficients and constants for intermediate concentrations and were then used to calculate prevalence estimates as a function of age. Hyposmia occurs in the tail of the distribution of olfactory sensitivity in the population distribution and is a joint function of age and odorant concentration; thus, if hyposmia is defined as the least sensitive 12% of a sample, test concentrations can be selected for different geriatric or education settings. For example, 1% might be selected for a population over the age of 40 and would be expected to approximate the NHANEs (1) hyposmia data (Fig 1) generated using odor identification error rates; 0.56% might be used in college and university settings.

| Age       | Odorant Concentration (% n-butanol in water) |              |              |             |              |              |            |              |
|-----------|----------------------------------------------|--------------|--------------|-------------|--------------|--------------|------------|--------------|
|           | <u>3.2</u>                                   | <u>1.8</u>   | <u>1.0</u>   | <u>0.56</u> | <u>0.32</u>  | <u>0.18</u>  | <u>0.1</u> | <u>0.056</u> |
| <b>5</b>  | 0.006                                        | 0.025        | 0.056        | 0.085       | 0.107        | <b>0.122</b> | 0.131      | 0.137        |
| 10        | 0.007                                        | 0.029        | 0.062        | 0.093       | 0.116        | 0.131        | 0.14       | 0.146        |
| <b>15</b> | 0.009                                        | 0.033        | 0.069        | 0.101       | <b>0.125</b> | 0.14         | 0.15       | 0.155        |
| 20        | 0.011                                        | 0.038        | 0.076        | 0.11        | 0.134        | 0.15         | 0.16       | 0.165        |
| <b>25</b> | 0.013                                        | 0.043        | 0.084        | <b>0.12</b> | 0.144        | 0.161        | 0.17       | 0.176        |
| 30        | 0.016                                        | 0.05         | 0.093        | 0.13        | 0.155        | 0.172        | 0.182      | 0.187        |
| 35        | 0.019                                        | 0.057        | 0.103        | 0.141       | 0.167        | 0.183        | 0.193      | 0.199        |
| 40        | 0.023                                        | 0.065        | 0.114        | 0.153       | 0.179        | 0.195        | 0.205      | 0.211        |
| <b>45</b> | 0.028                                        | 0.074        | <b>0.126</b> | 0.166       | 0.192        | 0.208        | 0.218      | 0.224        |
| 50        | 0.034                                        | 0.085        | 0.139        | 0.18        | 0.205        | 0.222        | 0.232      | 0.237        |
| 55        | 0.041                                        | 0.097        | 0.153        | 0.194       | 0.22         | 0.236        | 0.245      | 0.251        |
| 60        | 0.05                                         | 0.11         | 0.168        | 0.209       | 0.235        | 0.251        | 0.26       | 0.265        |
| <b>65</b> | 0.06                                         | <b>0.125</b> | 0.184        | 0.225       | 0.25         | 0.266        | 0.275      | 0.28         |
| 70        | 0.072                                        | 0.141        | 0.202        | 0.242       | 0.267        | 0.282        | 0.29       | 0.295        |
| 75        | 0.086                                        | 0.159        | 0.22         | 0.26        | 0.284        | 0.298        | 0.306      | 0.311        |
| 80        | 0.103                                        | 0.18         | 0.24         | 0.279       | 0.301        | 0.315        | 0.323      | 0.327        |
| <b>85</b> | <b>0.123</b>                                 | 0.202        | 0.261        | 0.298       | 0.32         | 0.332        | 0.34       | 0.344        |
| 90        | 0.146                                        | 0.226        | 0.283        | 0.318       | 0.338        | 0.35         | 0.357      | 0.361        |
| 95        | 0.173                                        | 0.252        | 0.306        | 0.339       | 0.358        | 0.369        | 0.375      | 0.379        |
| 100       | 0.203                                        | 0.28         | 0.331        | 0.361       | 0.377        | 0.387        | 0.393      | 0.396        |

<sup>1</sup>  $\beta_0$ : slope -1.086, intercept -1.86  
 $\beta_1$ : slope .00785, intercept 0.145
